# Supplementary material for: Apprentissage de l'écriture : une étude longitudinale
Source: Royal Society of Chemistry journal article supplement (doi:10.1039/d0ra10598h), 1999-01-01
Supplement: d0ra10598h1.pdf [file d0ra10598h1.pdf]

Supplementary material

For

**Determination of naphazoline HCl, pheniramine maleate and their official impurities in eye drops and biological fluid rabbit aqueous humor by LC-DAD method**

Khadiga M. Kelani<sup>a,b</sup>, Maha A. Hegazy<sup>a</sup>, Amal M. Hassan<sup>b</sup>, Mahmoud A. Tantawy<sup>a,c\*</sup>

<sup>a</sup>Analytical Chemistry Department, Faculty of Pharmacy, Cairo University, Kasr el Aini Street, 11562, Cairo, Egypt

<sup>b</sup>Analytical Chemistry Department, Faculty of Pharmacy, Modern University for Technology and Information, El-hadaba El-Wosta, Mokattam, 5th district, Cairo, Egypt.

<sup>c</sup>Chemistry Department, Faculty of Pharmacy, October 6 University, 6 October city, Giza, Egypt.

Corresponding author: Mahmoud A. Tantawy

Mobile phone: +2 01003838016

E-mail: [mahmoud.eltantawy@pharma.cu.edu.eg](mailto:mahmoud.eltantawy@pharma.cu.edu.eg)

Figure S1

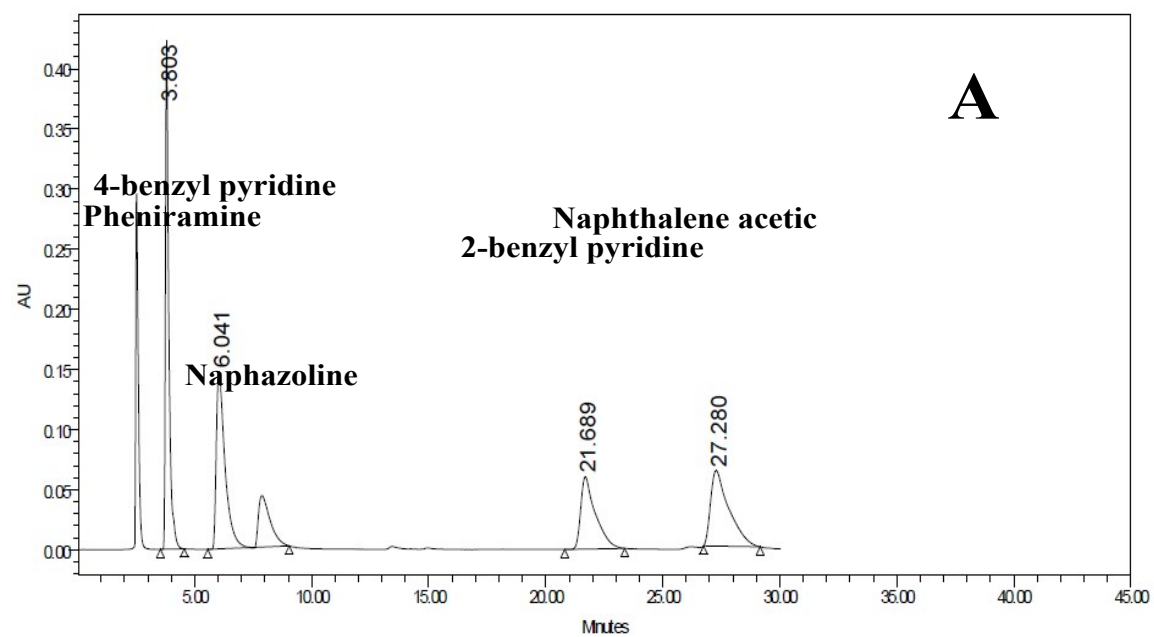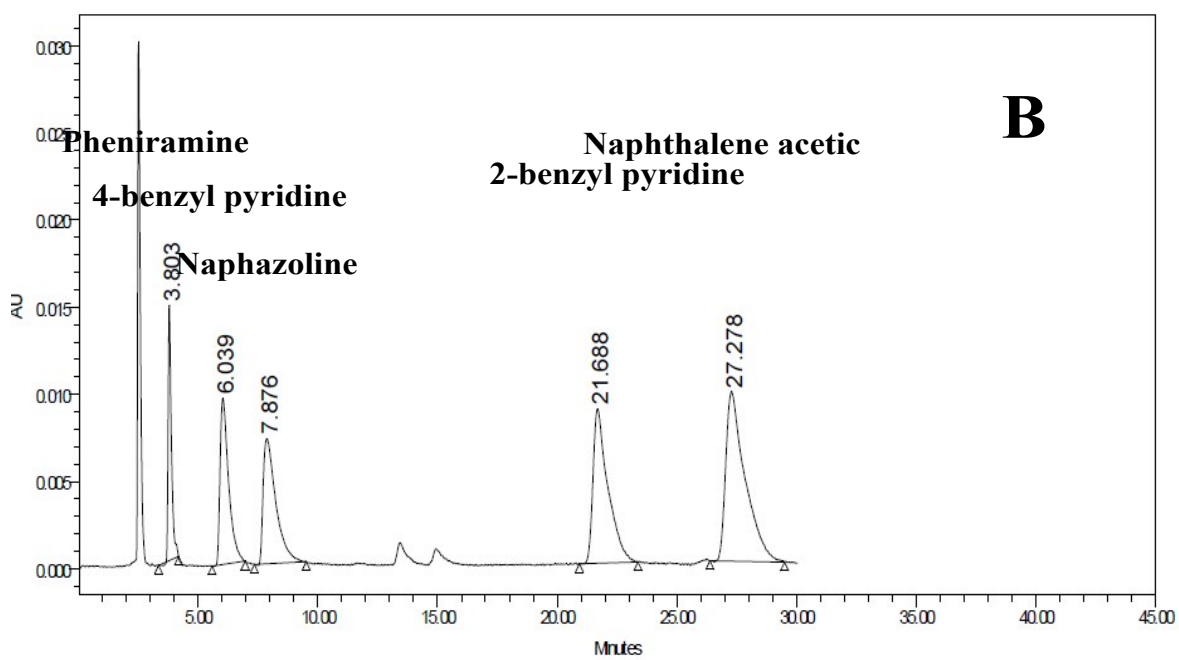

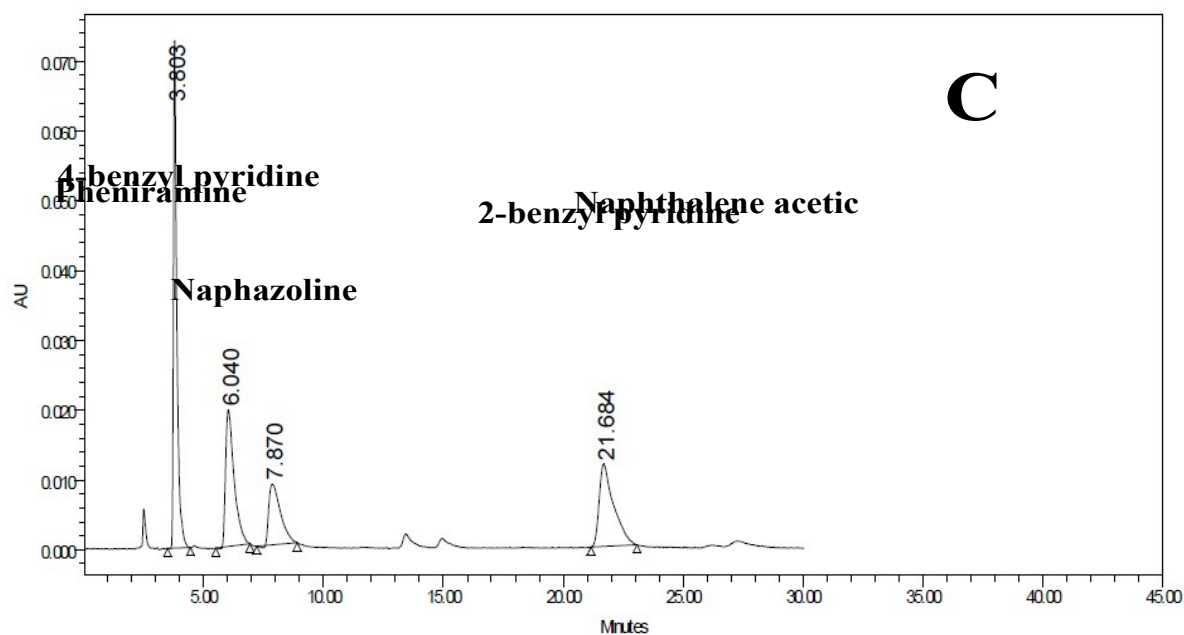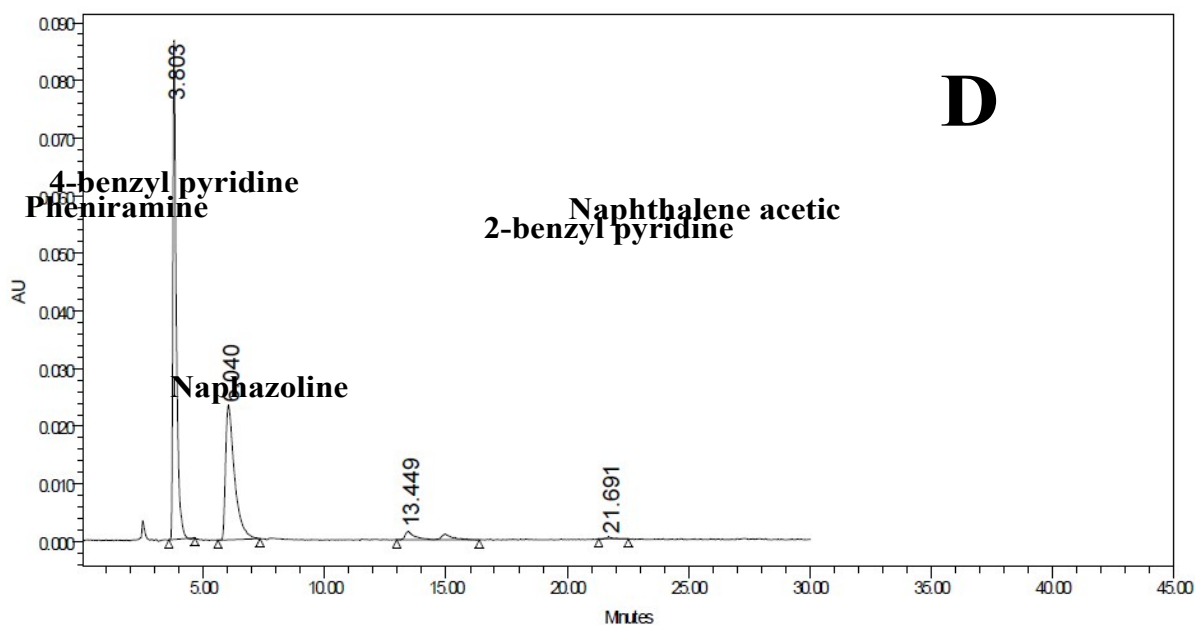

**Figure S1.** HPLC chromatograms of the five cited compounds using a hypersil ODS column (5 mm, 250-4.6 mm i.d.), mobile phase of pH 6.0 phosphate buffer: acetonitrile (70: 30, by volume), flow rate of 1.0 mL min<sup>-1</sup> and detection at wave length; 210 nm (A); 240 nm (B), 270 nm (C) and 280 nm (D) show lower peak response than the detection at 260 nm of the same concentration.

**Figure S2**

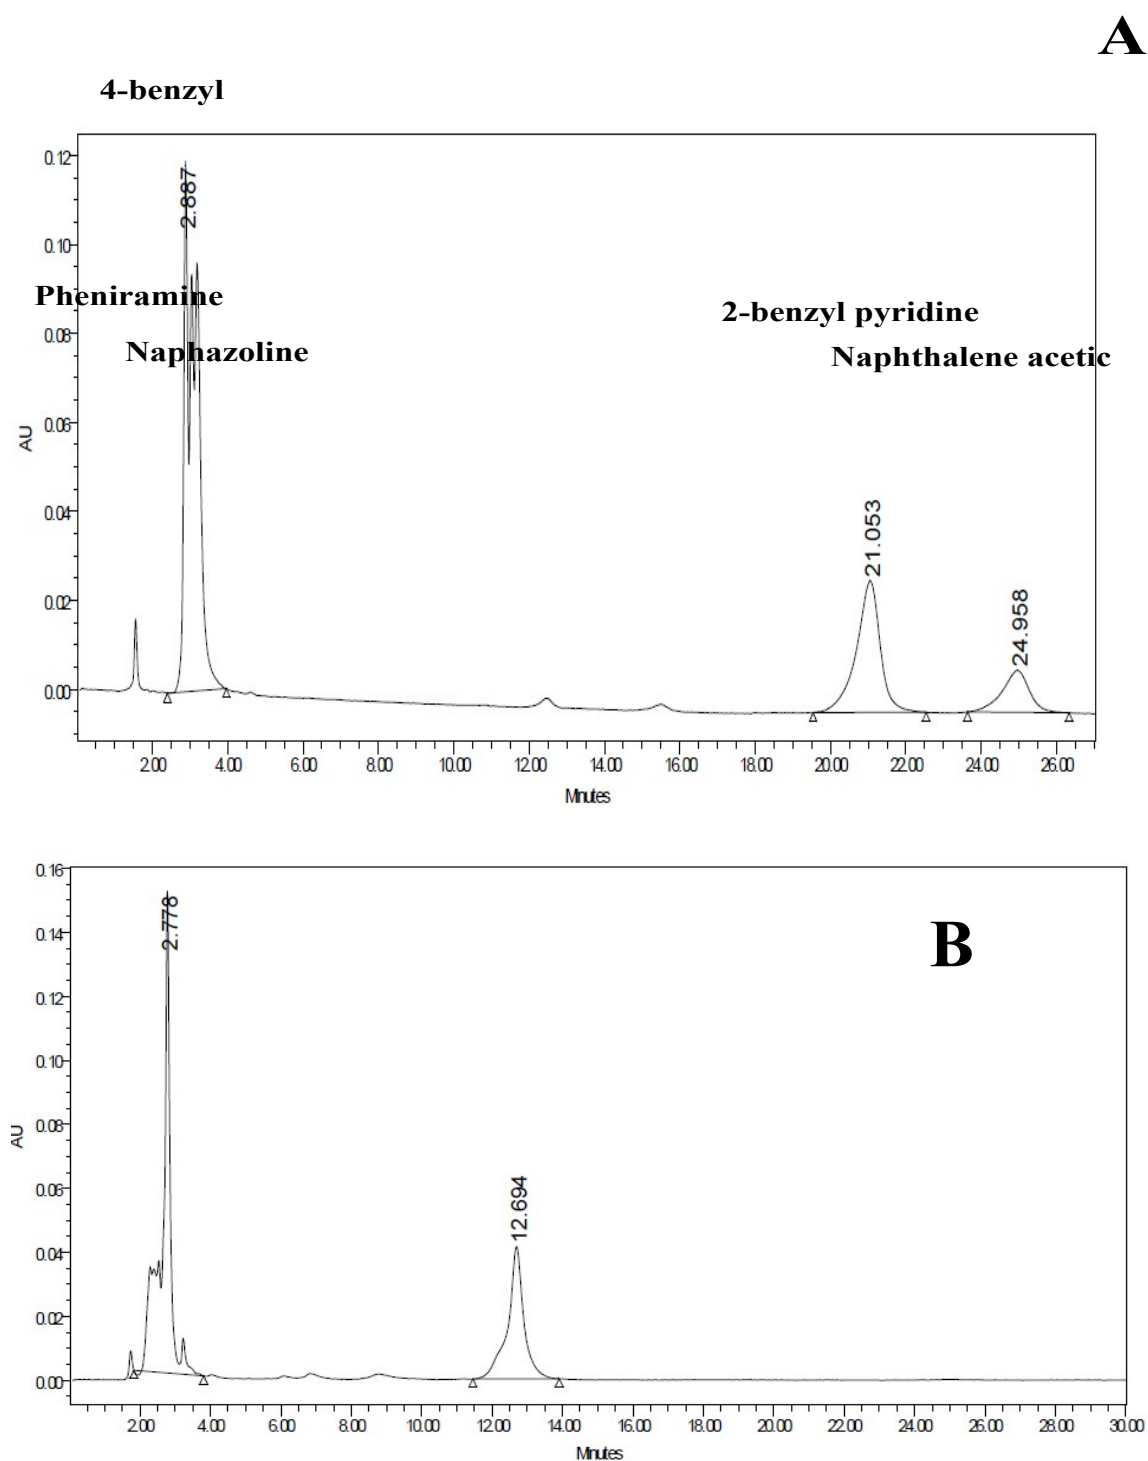

**Figure S2.** HPLC chromatograms of the five cited compounds using mobile phase of pH 6.0 phosphate buffer: acetonitrile (70: 30, by volume), flow rate of 1.0 mL min<sup>-1</sup>, detection at 260 nm, CN column (5 mm, 250- 4.6 mm i.d.) (A) and C8 column (5 mm, 250- 4.6 mm i.d.) (B), show lower separation efficiency than the used hypersil ODS column (5 mm, 250- 4.6 mm i.d.).

**Figure S3**

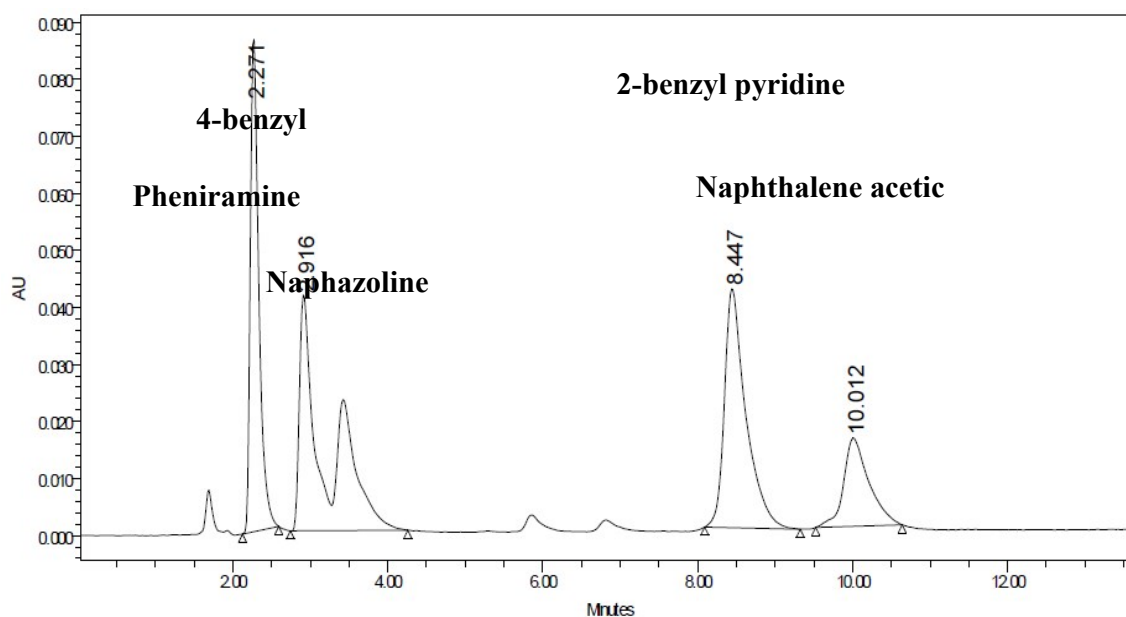

**Figure S3.** HPLC chromatogram of the five cited compounds using a hypersil ODS column (5 mm, 250-4.6 mm i.d.), mobile phase of pH 6.0 phosphate buffer: acetonitrile (50: 50, by volume), flow rate of 1.0 mL min<sup>-1</sup> and detection at 260 nm shows lower separation efficiency than the used mobile phase phosphate buffer: acetonitrile (70: 30, by volume)

**Figure S4**

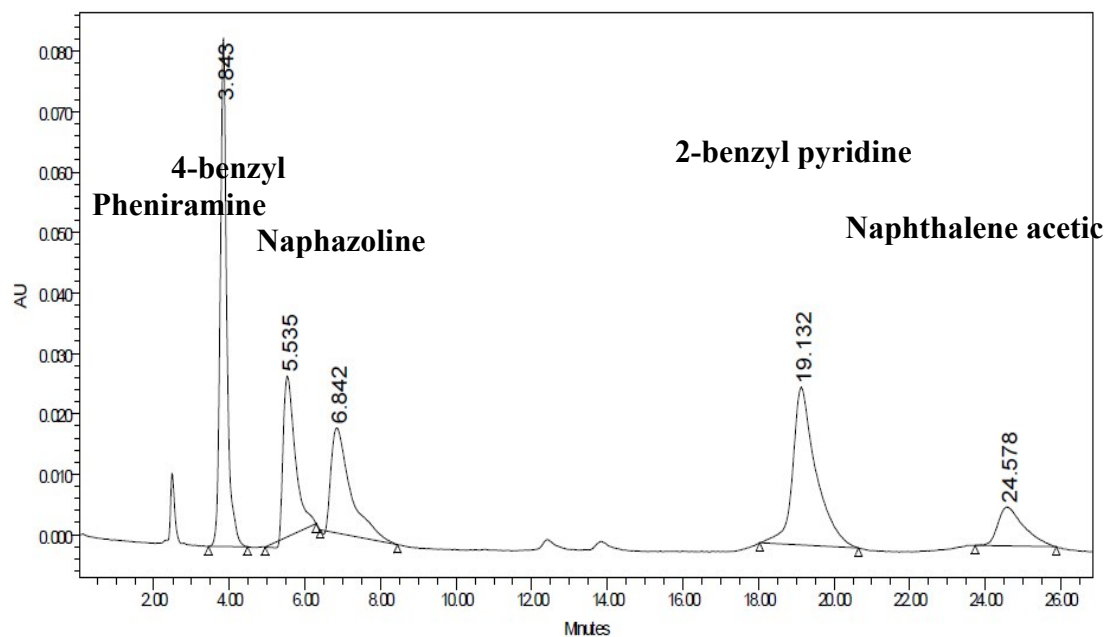

**Figure S4.** HPLC chromatogram of the five cited compounds using a hypersil ODS column (5 mm, 250-4.6 mm i.d.), mobile phase of pH 3.0 phosphate buffer: acetonitrile (70: 30, by volume), flow rate of 1.0 mL min<sup>-1</sup> and detection at 260 nm shows lower system suitability (theoretical plate and tailing factor) than the used mobile phase of pH 6.0.

**Figure S5**

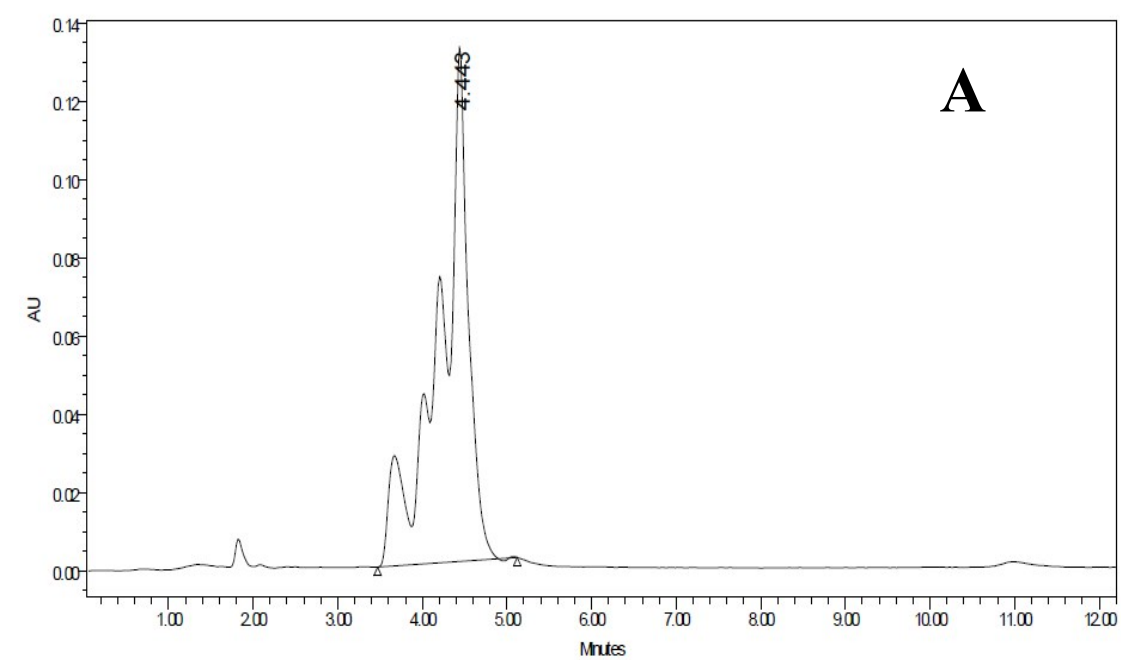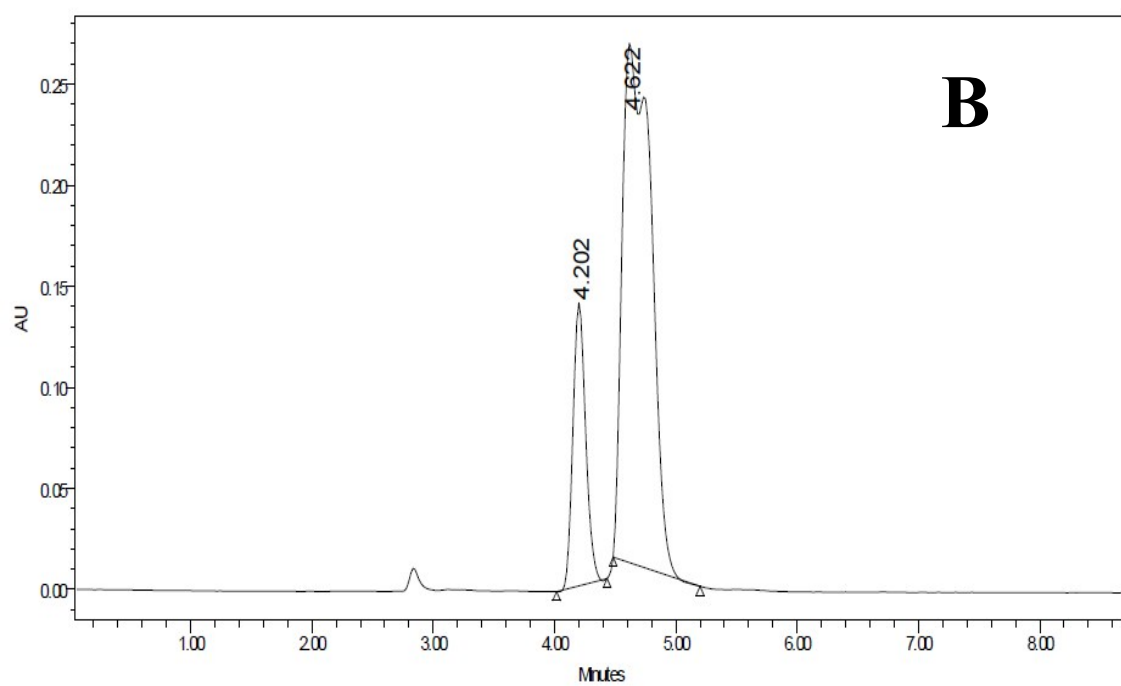

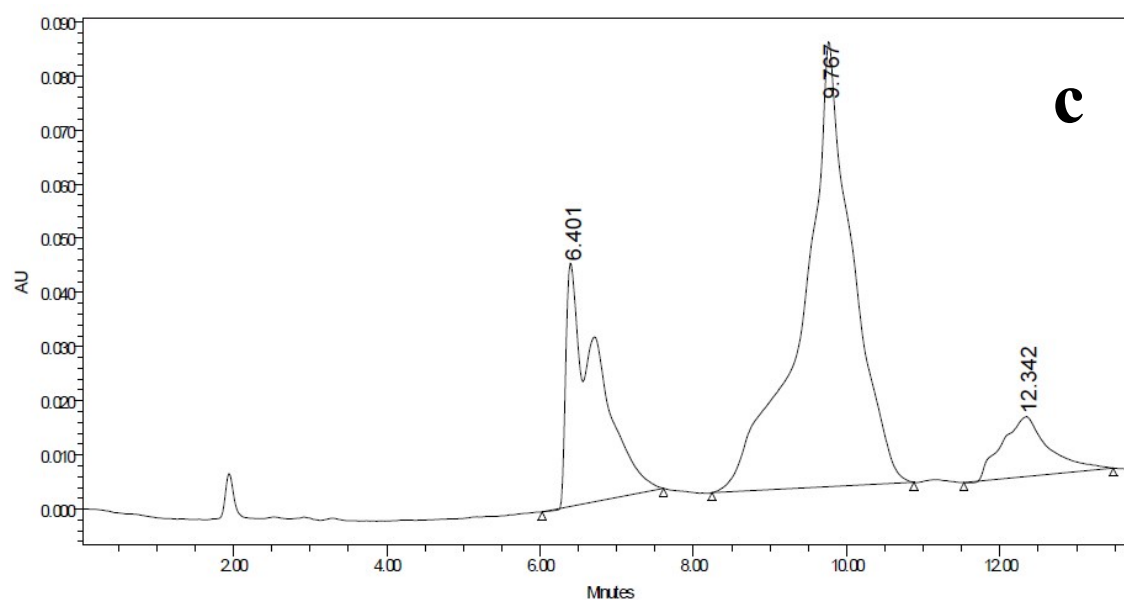

**Figure S5.** HPLC chromatograms of the five cited compounds using a hypersil ODS column (5 mm, 250-4.6 mm i.d.), flow rate of 1.0 mL min<sup>-1</sup>, detection at wave length 260 nm and mobile phase of pH 6.0 acetate buffer: acetonitrile with ratio; (40: 60, by volume) (A); (70: 30, by volume) (B) and (95: 5, by volume) (C) show lower peak separation efficiency than the separation using mobile phase of pH 6.0 of phosphate buffer: acetonitrile (70: 30, by volume).
